# Supplementary material for: Location matters: highly divergent protein levels in samples from different CNS compartments in a clinical trial of rituximab for progressive MS
Source: Springer Nature journal article supplement (doi:10.1186/s12987-020-00205-4), 2020-07-29
Supplement: MOESM1 [file 18230056]

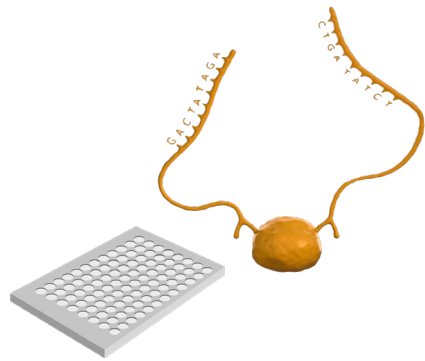

(A) Incubation

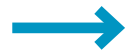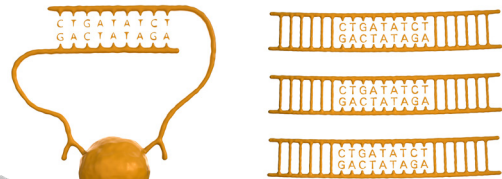

(B) Extension and pre-amplification

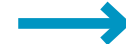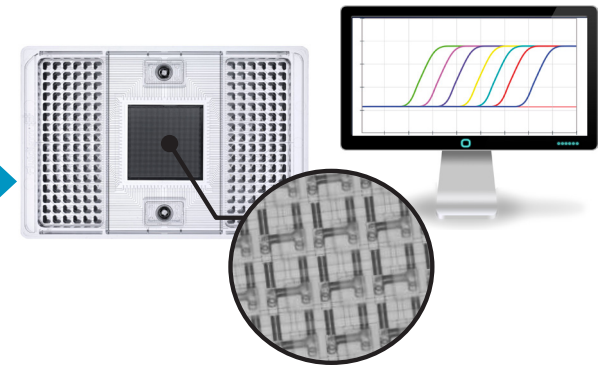

(C) Detection
